# Supplementary material for: Three-Dimensional Hydrogen-Bonded Porous Metal-Organic Framework for Natural Gas Separation with High Selectivity
Source: MDPI journal article supplement (doi:10.3390/molecules29020424), 2024-01-15
Supplement: s1 [file s1]

---

## Supporting Information

### **3D Hydrogen-Bonded Porous Metal-Organic Framework for Natural Gas Separation**

**with High Selectivity**   Wenyan Dan\*, Guangfeng Wei, and Xiangdong Fang\*

*College of Chemical Science and Engineering, Tongji University, Siping Road 1239, Shanghai 200092, China.*

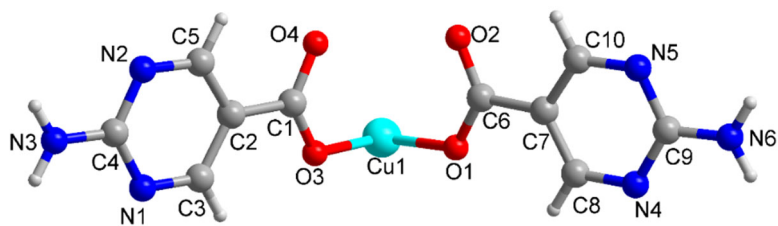

**Figure S1.** The asymmetric unit of compound **TJU-Dan-5**.

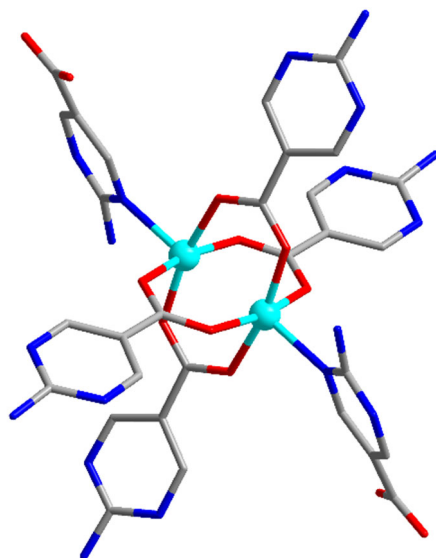

**Figure S2.** The coordinated environment around the metal center of **TJU-Dan-5** (Color code; Carbon: grey, oxygen: red, nitrogen: blue, copper: blue).

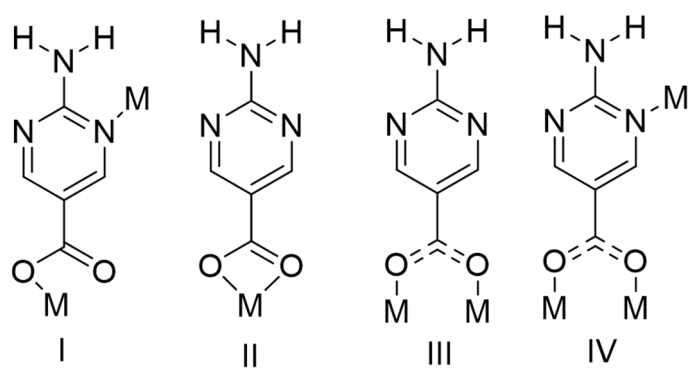

**Figure S3.** The coordination mode of Hapc.

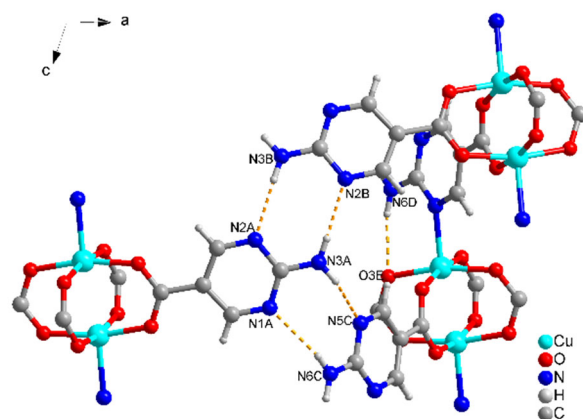

**Figure S4.** Hydrogen bonds in TJU-Dan-5 (Symmetry codes: A:  $1.5-x, 1.5-y, 1-z$ ; B:  $0.5+x, 1.5-y, -0.5+z$ ; C:  $2-x, 1-y, 1-z$ ; D:  $2-x, y, 0.5-z$ ; E:  $0.5+x, -0.5+y, z$ ; orange dotted lines are added to highlight the Hydrogen bonds).

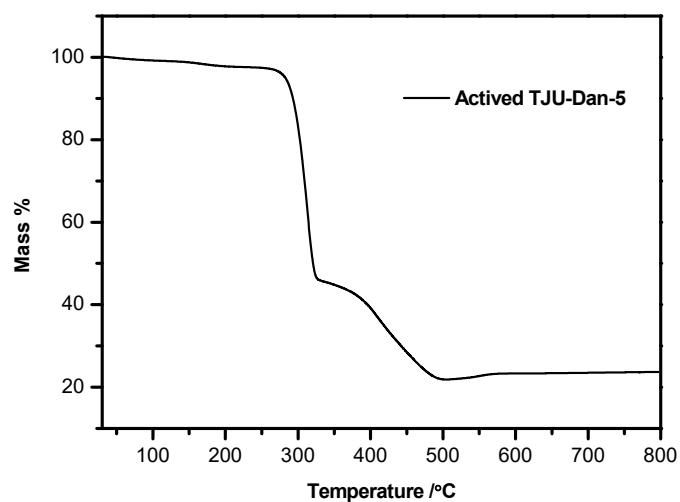

**Figure S5.** TGA curve of active TJU-Dan-5.

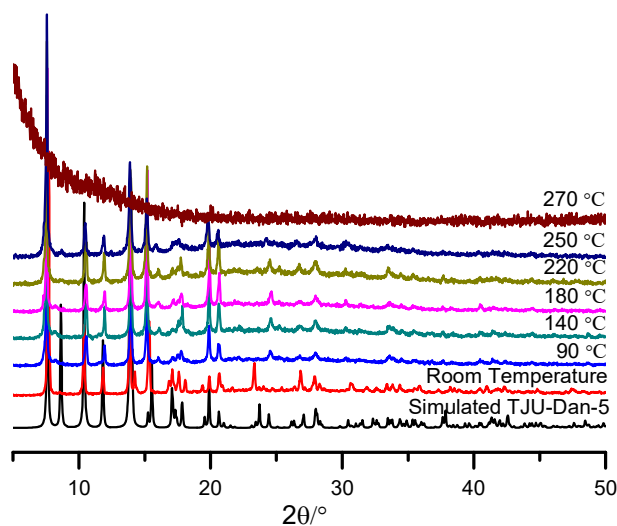

**Figure S6.** PXRD patterns of TJU-Dan-5 in air from room temperature to 270 °C.

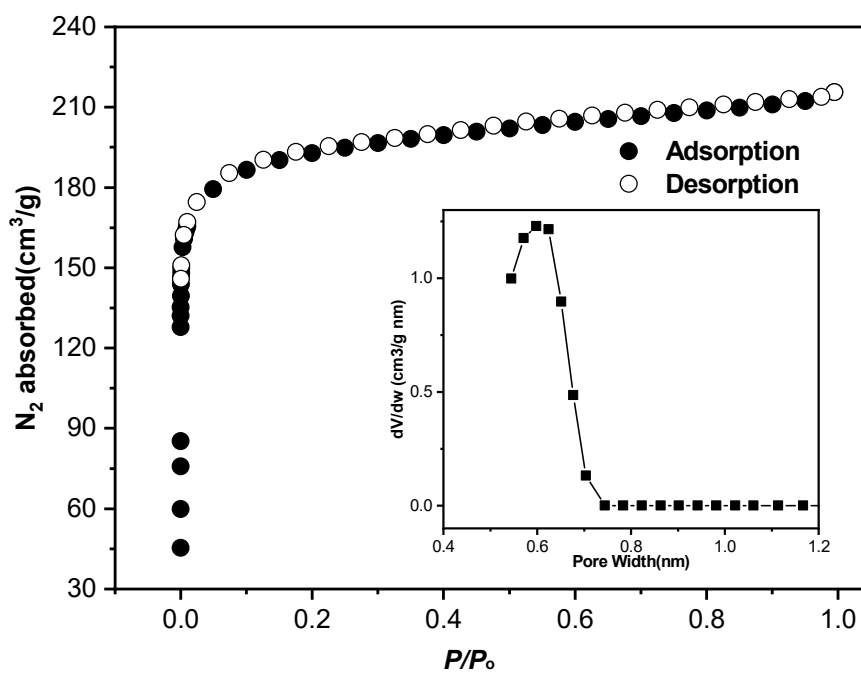

**Figure S7.** Nitrogen sorption isotherm of TJU-Dan-5 at 77 K. The inset graph indicates the pore size distribution.

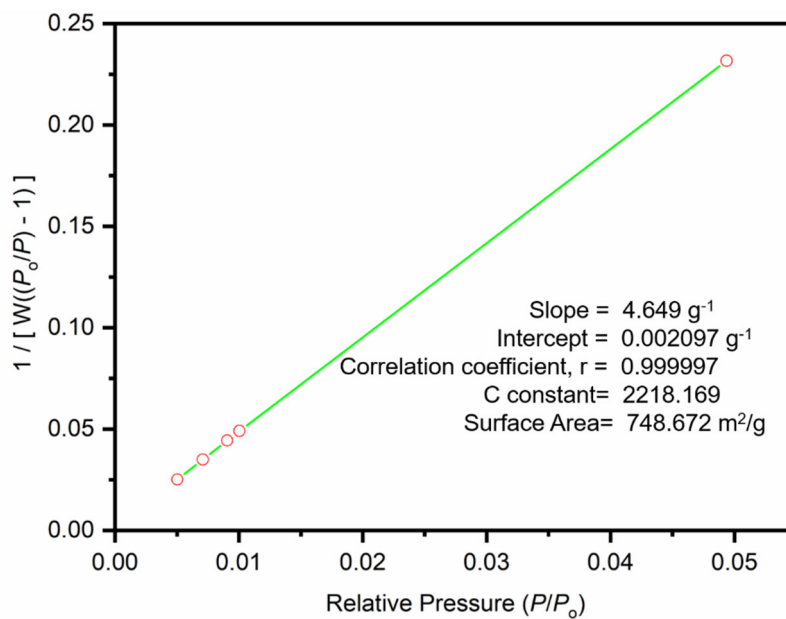

**Figure S8.** BET surface area plot for TJU-Dan-5

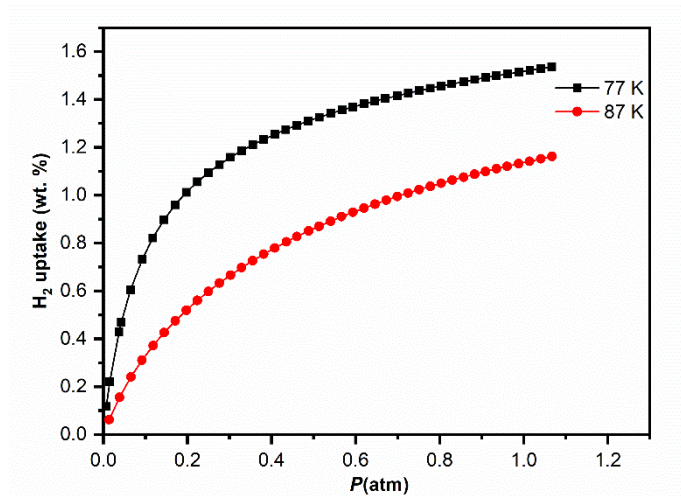

**Figure S9.** Hydrogen sorption isotherm of TJU-Dan-5 at 77 K and 87 K.

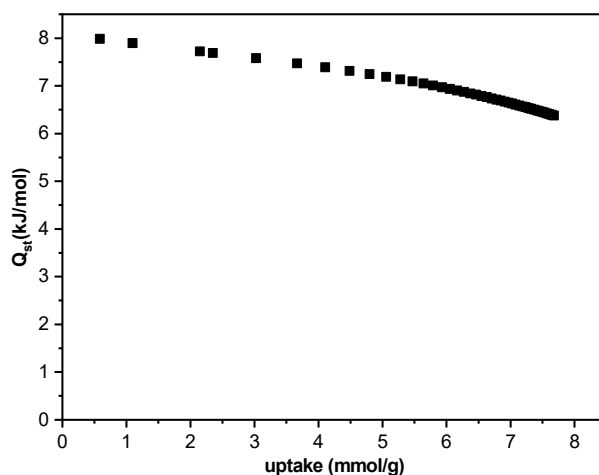

**Figure S10.** Isosteric heat of adsorption  $Q_{st}$  of  $H_2$  for TJU-Dan-5.

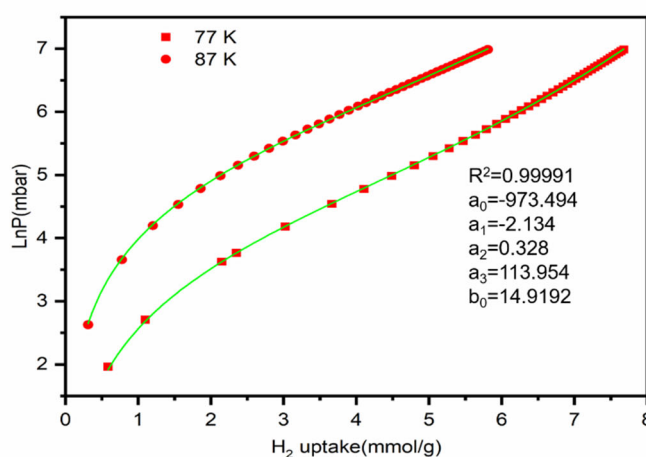

**Figure S11.** The  $H_2$  isotherms at 77 K and 87 K (symbols) and the Virial equation fits (lines) for TJU-Dan-5

To perform the IAST calculations, an adsorption model is needed in order to fit a discrete set of adsorption data from single-component isotherms with a continuous function. Herein, we used a Dual-site Langmuir-Freundlich (DSLFF, Equation (S1)) model for the fitting of the adsorption isotherms.

$$q = \frac{a_1 b_1 P^k}{1 + b_1 P^k} + \frac{a_2 b_2 P^k}{1 + b_2 P^k} \quad (S1)$$

$P$  is the pressure of the bulk gas at equilibrium with the adsorbed phase (kPa),  $q$  is the adsorbed amount per mass of adsorbent (mmol/g),  $a$  and  $q$  are the saturation capacities of sites 1 and 2 (mmol/g),  $b$  and  $k$  are the

affinity coefficients of sites 1 and 2 (1/kPa), and  $c$  and  $t$  represent the deviations from an ideal homogeneous surface.  $R$  is the universal gas constant.

The adsorption selectivity for binary mixtures defined by Equation (S2).

$$S_{i/j} = \frac{x_i/y_i}{x_j/y_j} \quad (\text{S2})$$

where  $S$  is the selectivity factor,  $x_i$  represents the quantity adsorbed of component  $i$ , and  $y_i$  represents the partial pressure of component  $i$ .

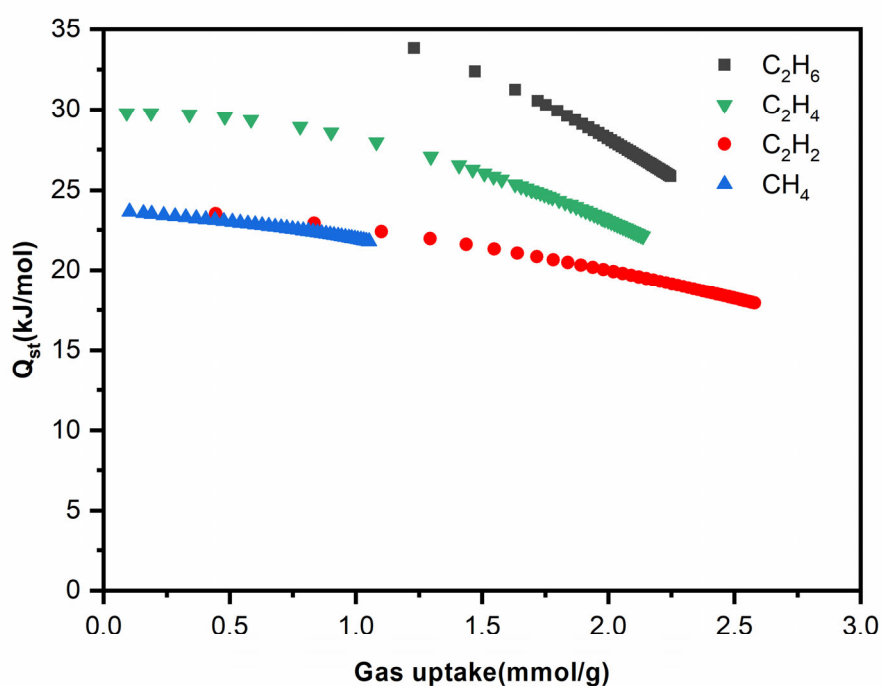

**Figure S12.** Isosteric heat of adsorption  $Q_{st}$  of C<sub>2</sub>H<sub>6</sub>, C<sub>2</sub>H<sub>4</sub>, C<sub>2</sub>H<sub>2</sub>, CH<sub>4</sub> for TJU-Dan-5.

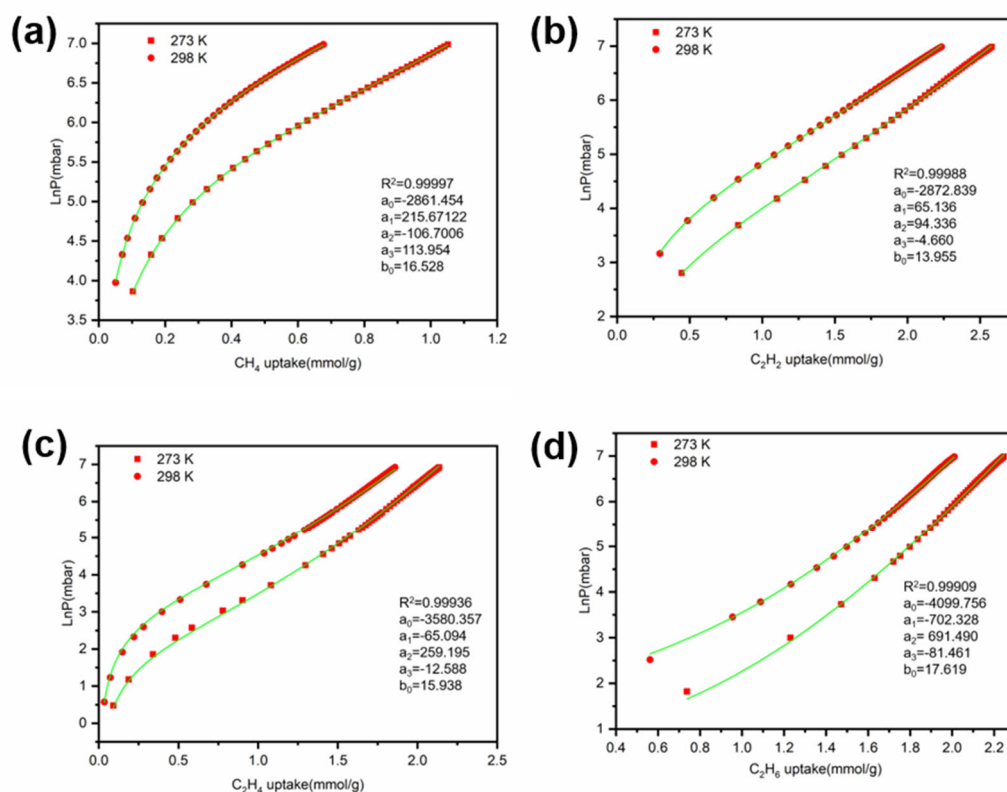

**Figure S13.** The gas isotherms at 273 K and 298 K (symbols) and the Virial equation fits (lines) for TJU-Dan-5: (a)  $\text{CH}_4$ , (b)  $\text{C}_2\text{H}_2$ , (c)  $\text{C}_2\text{H}_4$ , (d)  $\text{C}_2\text{H}_6$ .

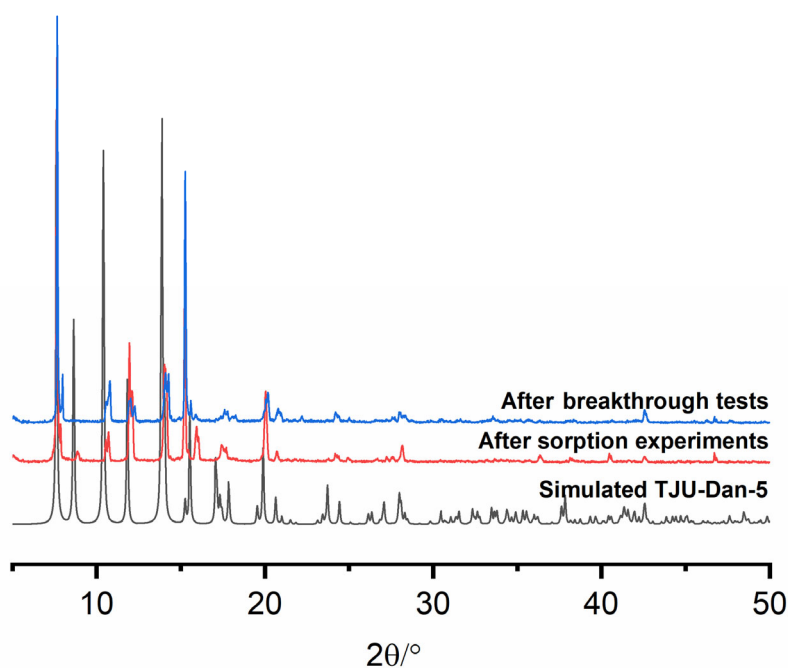

**Figure S14.** PXRD patterns of TJU-Dan-5 after sorption experiments and breakthrough tests.



**Table S1.** Crystal data and structure refinement of **TJU-Dan-5**.

| Entry                                      | <b>TJU-Dan-5</b>                                                  |
|--------------------------------------------|-------------------------------------------------------------------|
| Empirical formula                          | C <sub>10</sub> H <sub>8</sub> CuN <sub>6</sub> O <sub>4</sub>    |
| Formula weight                             | 339.75                                                            |
| Temperature [K]                            | 296(2)                                                            |
| Crystal system                             | monoclinic                                                        |
| Space group (number)                       | <b>C2/c</b> (15)                                                  |
| <i>a</i> [Å]                               | 24.306(6)                                                         |
| <i>b</i> [Å]                               | 11.394(3)                                                         |
| <i>c</i> [Å]                               | 13.189(3)                                                         |
| $\alpha$ [°]                               | 90                                                                |
| $\beta$ [°]                                | 107.218(7)                                                        |
| $\gamma$ [°]                               | 90                                                                |
| Volume [Å <sup>3</sup> ]                   | 3489.1(15)                                                        |
| <i>Z</i>                                   | 8                                                                 |
| $\rho_{\text{calc}}$ [g·cm <sup>−3</sup> ] | 1.294                                                             |
| $\mu$ [mm <sup>−1</sup> ]                  | 1.272                                                             |
| <i>F</i> (000)                             | 1368                                                              |
| Crystal size [mm <sup>3</sup> ]            | 0.200×0.120×0.030                                                 |
| Crystal colour                             | blue                                                              |
| Crystal shape                              | plate                                                             |
| Radiation                                  | MoK $\alpha$ ( $\lambda$ =0.71073 Å)                              |
| 2 $\Theta$ range [°]                       | 6.47 to 51.46 (0.82 Å)                                            |
| Index ranges                               | −29 ≤ <i>h</i> ≤ 29<br>−13 ≤ <i>k</i> ≤ 13<br>−16 ≤ <i>l</i> ≤ 16 |
| Reflections collected                      | 28193                                                             |
| Independent reflections                    | 3277                                                              |
| <i>R</i> <sub>int</sub>                    | 0.0646                                                            |
| <i>R</i> <sub>sigma</sub>                  | 0.0379                                                            |
| Completeness to $\Theta$ = 25.242°         | 99.6 %                                                            |
| Data / Restraints / Parameters             | 3277/0/190                                                        |
| Goodness-of-fit on <i>F</i> <sup>2</sup>   | 1.059                                                             |
| Final <i>R</i> indexes                     | <i>R</i> <sub>1</sub> = 0.0555                                    |
| [ <i>I</i> ≥ 2 $\sigma$ ( <i>I</i> )]      | w <i>R</i> <sub>2</sub> = 0.1544                                  |
| Final <i>R</i> indexes                     | <i>R</i> <sub>1</sub> = 0.0674                                    |
| [all data]                                 | w <i>R</i> <sub>2</sub> = 0.1623                                  |
| Largest peak/hole [e·Å <sup>−3</sup> ]     | 1.12/−0.47                                                        |

**Table S2.** Selected bond lengths (Å) and angles (°) for **TJU-Dan-5**.

| TJU-Dan-5            |            |                      |           |  |
|----------------------|------------|----------------------|-----------|--|
| Cu1–O3               | 1.972(4)   | Cu1–O1               | 1.976(4)  |  |
| Cu1–O2 <sup>#1</sup> | 1.973(4)   | Cu1–N4 <sup>#2</sup> | 2.177(4)  |  |
| Cu1–O4 <sup>#1</sup> | 1.975(4)   | C1–O4                | 1.258(6)  |  |
| O1–C6                | 1.264(6)   | C1–O3                | 1.265(6)  |  |
| N1–C3                | 1.314(7)   | C1–C2                | 1.485(7)  |  |
| N1–C4                | 1.348(7)   | C2–C3                | 1.397(7)  |  |
| O2–C6                | 1.254(6)   | N3–C4                | 1.322(7)  |  |
| N2–C5                | 1.328(7)   | N5–C9                | 1.356(7)  |  |
| N2–C4                | 1.356(7)   | C6–C7                | 1.494(7)  |  |
| C2–C5                | 1.375(7)   | N6–C9                | 1.334(7)  |  |
| N4–C8                | 1.341(6)   | C7–C10               | 1.399(8)  |  |
| N4–C9                | 1.357(7)   | N5–C10               | 1.322(8)  |  |
| O3–Cu1–O2            | 88.92(18)  | C6–O1–Cu1            | 123.1(3)  |  |
| O3–Cu1–O4            | 168.06(14) | C6–O2–Cu1            | 122.7(4)  |  |
| O2–Cu1–O4            | 90.49(18)  | C1–O3–Cu1            | 120.0(3)  |  |
| O3–Cu1–O1            | 89.24(18)  | C1–O4–Cu1            | 125.9(3)  |  |
| O2–Cu1–O1            | 168.04(15) | C8–N4–Cu1            | 116.8(3)  |  |
| O4–Cu1–O1            | 88.87(18)  | C9–N4–Cu1            | 125.4(3)  |  |
| O3–Cu1–N4            | 99.74(15)  | O4–Cu1–N4            | 92.17(15) |  |
| O2–Cu1–N4            | 96.63(16)  | O1–Cu1–N4            | 95.33(16) |  |

**Table S3.** Hydrogen bonds for **TJU-Dan-5**.

| D–H···A [Å]               | d(D–H) [Å] | d(H···A) [Å] | d(D···A) [Å] | <(DHA) [°] |
|---------------------------|------------|--------------|--------------|------------|
| N3–H3A···N5 <sup>#1</sup> | 0.86       | 2.32         | 3.051(7)     | 142.5      |
| N3–H3B···N2 <sup>#2</sup> | 0.86       | 2.13         | 2.984(6)     | 169.5      |
| N6–H6B···O3 <sup>#3</sup> | 0.86       | 2.18         | 2.988(6)     | 155.3      |
| N6–H6A···N1 <sup>#4</sup> | 0.86       | 2.33         | 3.054(6)     | 142.3      |

Symmetry transformations used to generate equivalent atoms:

#1: -0.5+X, 0.5+Y, +Z; #2: 1-X, +Y, 1.5-Z; #3: 1.5-X, -0.5+Y, 0.5-Z; #4: 0.5+X, -0.5+Y, +Z;

**Table S4.** Parameters for DSLF isotherm fits at 298 K.

|                                             | <b>a</b> | <b>b</b> | <b>c</b> | <b>q</b> | <b>k</b> | <b>t</b> | <b>R<sup>2</sup></b> |
|---------------------------------------------|----------|----------|----------|----------|----------|----------|----------------------|
| <b>CH<sub>4</sub>@TJU-Dan-5</b>             | 0.07245  | 0.05856  | 0.97662  | 1.66511  | 0.00324  | 1.10952  | 0.9999               |
| <b>C<sub>2</sub>H<sub>2</sub>@TJU-Dan-5</b> | 1.10086  | 0.13390  | 1        | 1.81175  | 0.001683 | 1        | 0.9988               |
| <b>C<sub>2</sub>H<sub>4</sub>@TJU-Dan-5</b> | 1.40516  | 0.16663  | 1.09161  | 1.15993  | 0.01219  | 0.89703  | 1                    |
| <b>C<sub>2</sub>H<sub>6</sub>@TJU-Dan-5</b> | 1.26825  | 0.43525  | 1.10229  | 1.59914  | 0.06749  | 0.55141  | 0.9999               |
